# Supplementary material for: Characterization of a Chickpea Mutant Resistant to Phelipanche aegyptiaca Pers. and Orobanche crenata Forsk
Source: MDPI journal article supplement (doi:10.3390/plants10122552), 2021-11-23
Supplement: s1 [file s1]

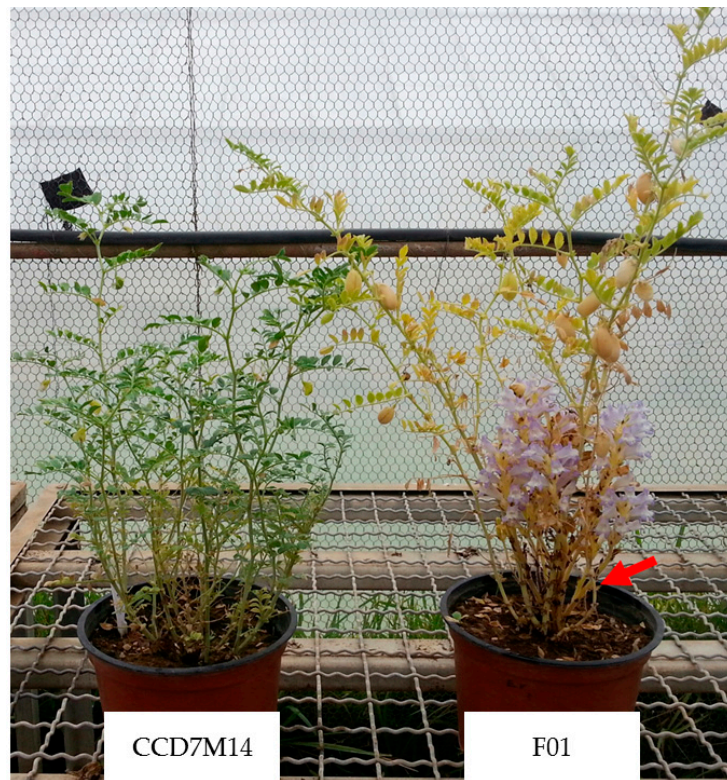

**Figure S1.** WT F01 (right) and CCD7M14 (left) plants growing in soil mixed with seeds of *P. aegyptiaca* at a concentration of 20 mg seeds per kg soil.

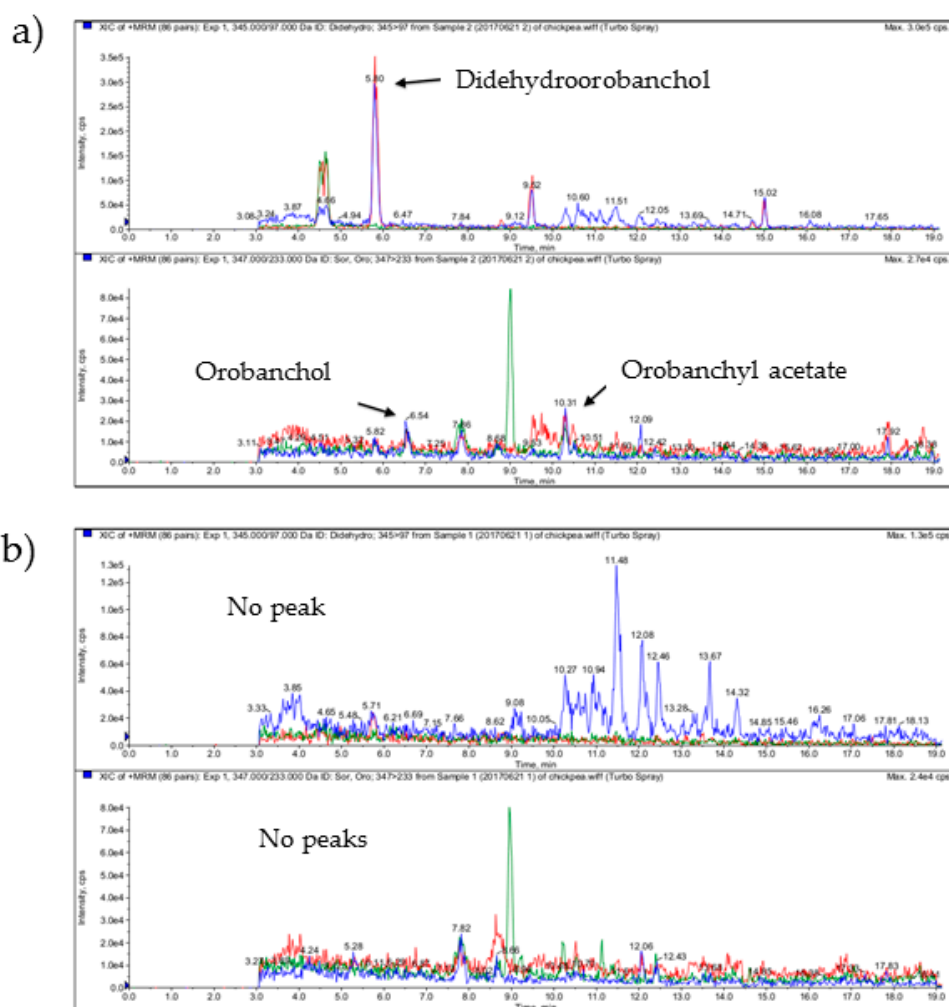

**Figure S2.** Selected reaction monitoring (SRM) chromatograms of WT F01 (a) and CCD7M14 (b) root exudates. Determination of SLs was based on the retention time and transition of  $m/z$  345 > 97 for didehydroorobanchol and 347 > 233 for orobanchol and orobanchyl acetate.
